# Supplementary material for: Predictors of elevational biodiversity gradients change from single taxa to the multi-taxa community level
Source: PubMed Central journal article supplement (PMC5192166; doi:10.1038/ncomms13736), 2016-12-22
Supplement: ncomms13736-s1.pdf [file ncomms13736-s1.pdf]

1 **Supplementary Figures**

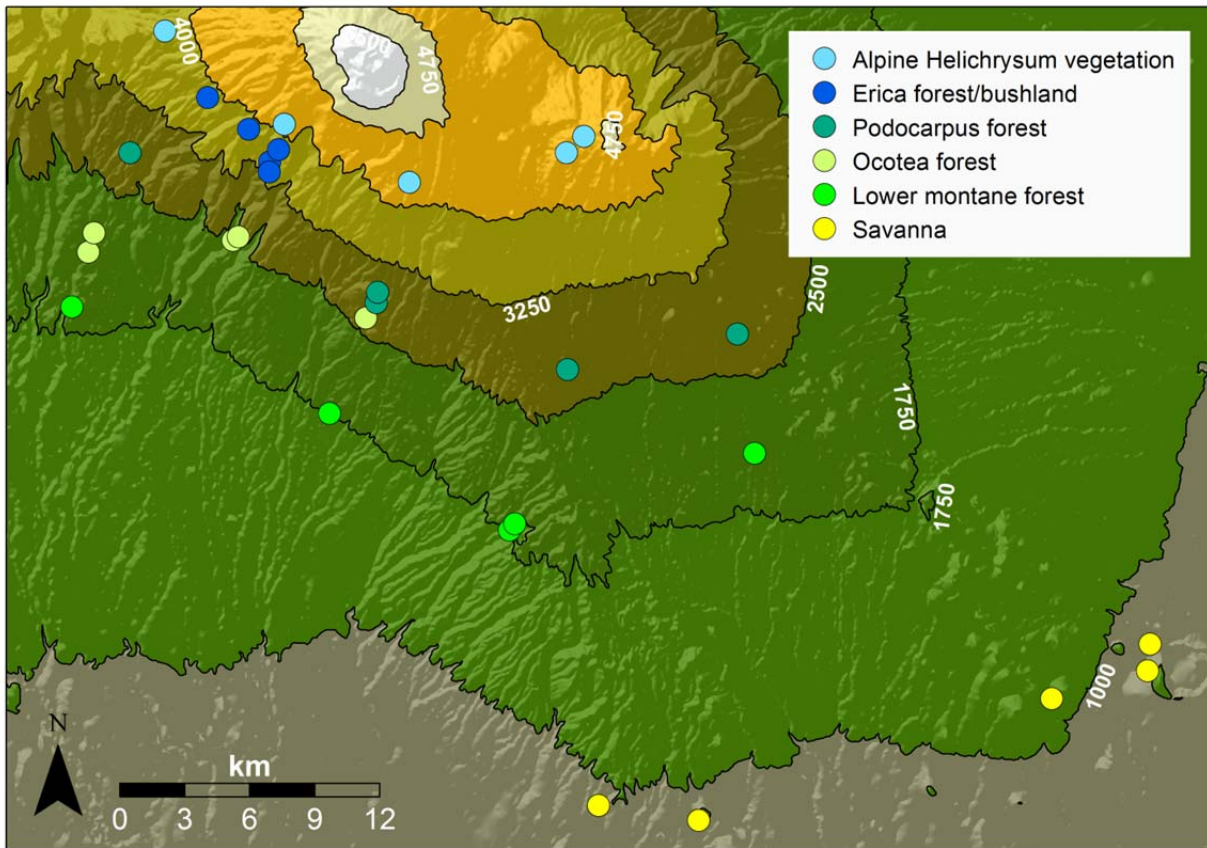

2

3 **Supplementary Figure 1| Study area and distribution of study sites on Mt. Kilimanjaro.**

4 Five replicate study sites were selected for each of the six major natural habitats on Mt.

5 Kilimanjaro. The five study sites of each habitat type were distributed in a way to achieve a fine

6 scale within-habitat elevational gradient.

7

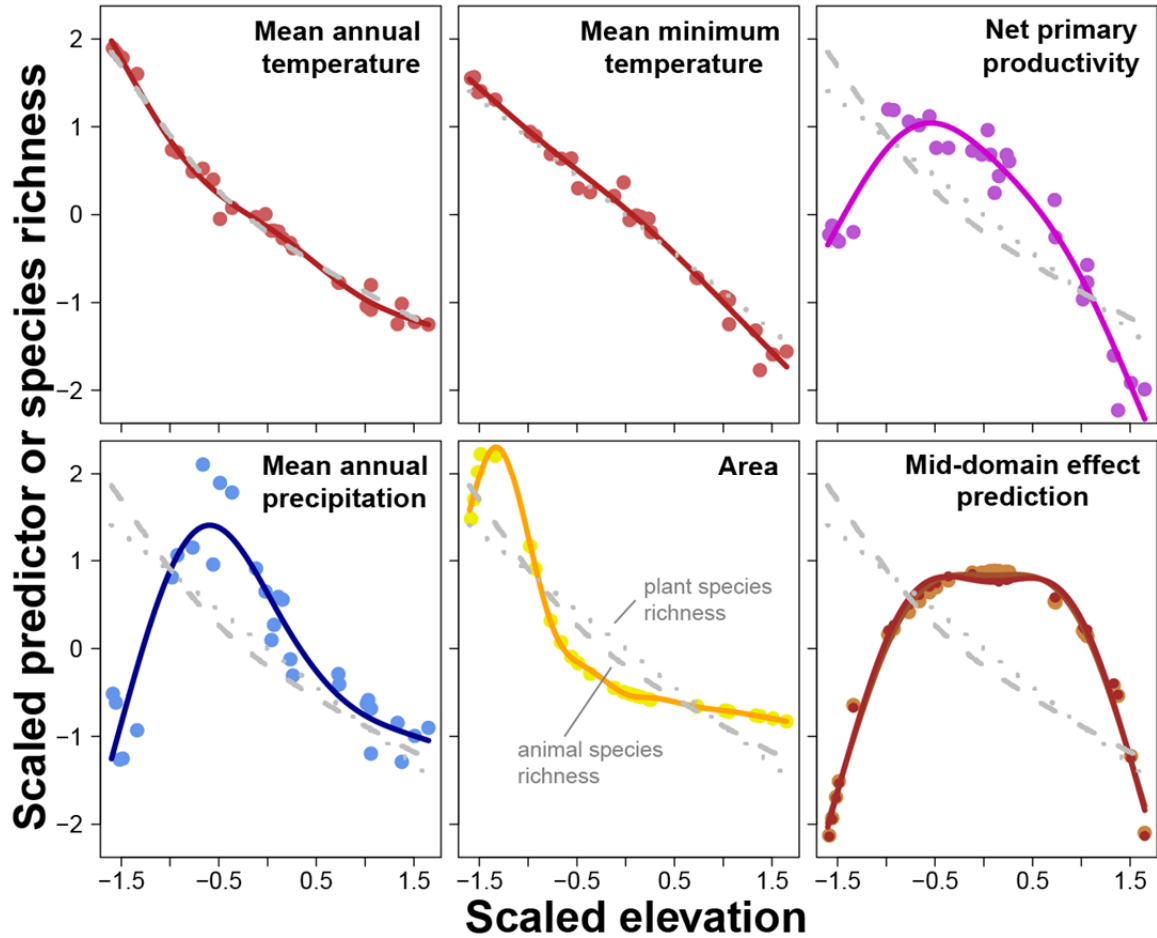

8

9

10 **Supplementary Figure 2| Trends in predictor variables with elevation.** Points indicate  
 11 measures for individual study sites and lines are predictions of generalized additive models  
 12 (generalized additive models,  $N = 30$ ,  $P < 0.05$ ). Trends in animal and plant elevational species  
 13 richness are plotted as dashed lines. For reasons of comparability, all data were z-transformed.

14

15

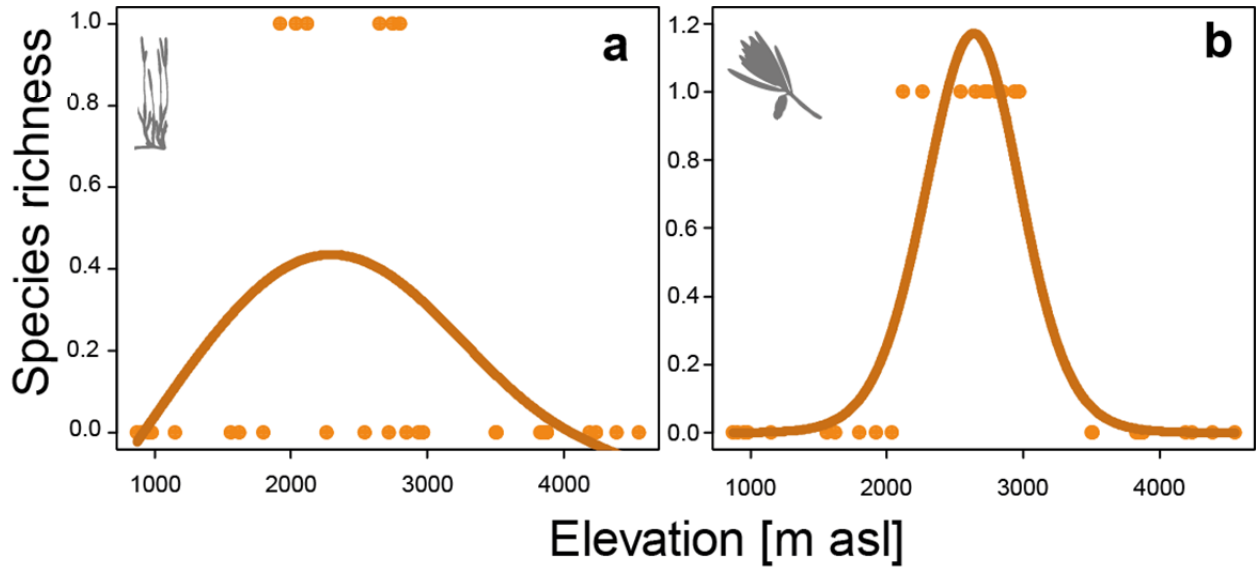

16

17 **Supplementary Figure 3| Elevational species richness patterns of species-poor taxa.** Shown

18 are original species richness measures (dots) and predictions of generalized additive models

19 (lines) for Lycopodiopsida (**a**) and conifers (**b**) (generalized additive models,  $N = 30$ ,  $P < 0.05$ ).

20

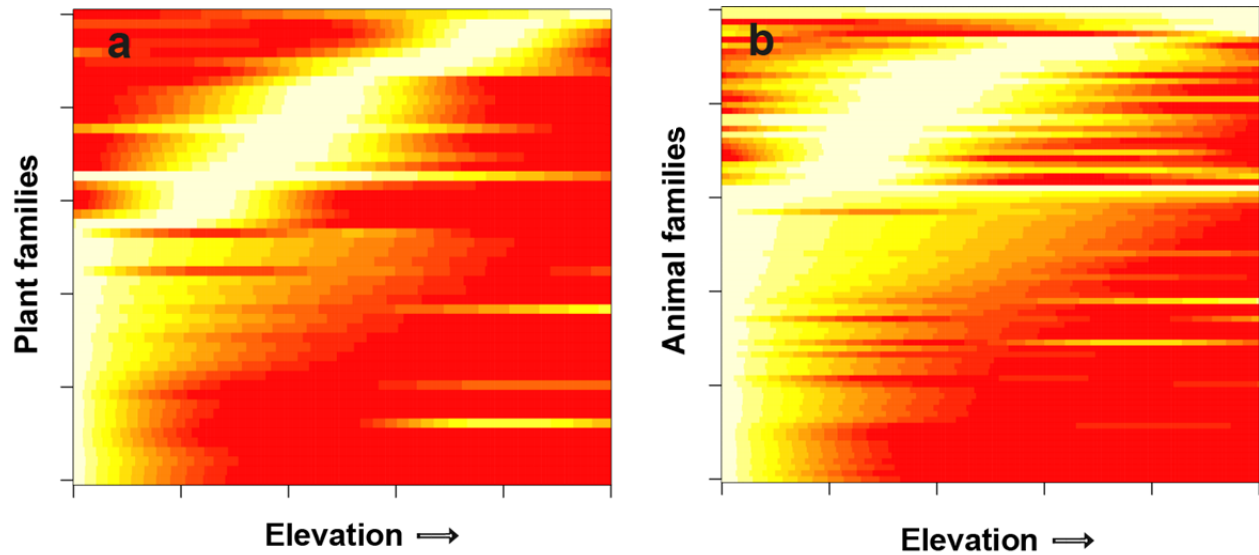

21  
 22 **Supplementary Figure 4| Elevational species richness of single families.** Shown is the  
 23 distribution of species richness along the elevational gradients for individual plant (a) and animal  
 24 families (b). Only families with more than four species were considered (i.e. 50 plant and 80  
 25 animal families). Each row shows the predicted species density of one family along the  
 26 elevational gradient of ~800 to ~4600 m asl in heat colors (red = lowest species richness, bright  
 27 yellow = highest species richness). Species richness of most families peaked at the lowest  
 28 elevation. However, for families exhibiting hump-shaped distribution patterns, the respective  
 29 elevations of highest species richness were variable and not centered in the mid-elevation of the  
 30 gradient.

31

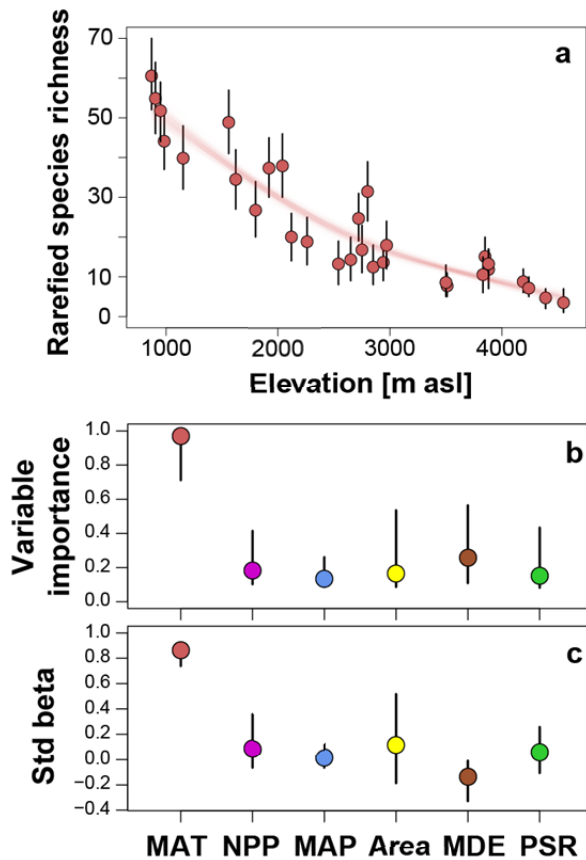

33

34 **Supplementary Figure 5| Robustness of results.** Differences in sampling intensity among  
 35 animal taxa may have affected results found at the community-level. We therefore analyzed how  
 36 standardizing the sampling intensity across taxa influenced patterns of elevational diversity (**a**)  
 37 and the support of predictor variables (**b, c**). We repeatedly ( $N = 5000$ ), randomly selected 83  
 38 individuals of each taxon (i.e. the number of individuals of the taxon with the lowest numbers of  
 39 collected specimens, i.e. ‘other aculeate wasps’) and calculated for these rarefied data the mean  
 40 and 95%CI of rarefied species richness for individual study sites (**a**, dots with s.e.m. bars) and  
 41 model predictions of elevational diversity (**a**, lines) derived from generalized additive models. In  
 42 Fig. 5a model predictions are shown for five hundred randomly selected data sets (lines).  
 43 Additionally, we calculated for all 5000 rarefied data sets the support for individual predictor

44 variables using multi-model inference in the same way has done with the original data set. Figure  
45 5b and 5c show the mean and 95%CI of variable importance and standardized beta values for  
46 each predictor variable. MAT = mean annual temperature, NPP = net primary productivity, MAP  
47 = mean annual precipitation, Area = area, MDE = mid-domain effect predictions, PSP = plant  
48 species richness.

49

50

51

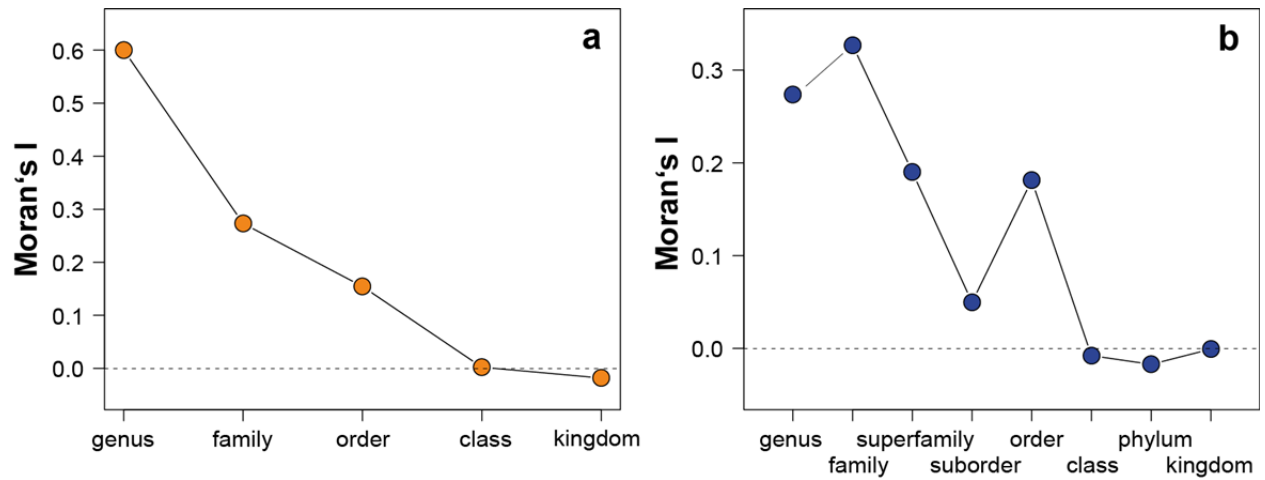

53

### 54 **Supplementary Figure 6| Phylogenetic autocorrelation in elevational distributions.**

55 Correlograms show Moran's I values indicating levels of phylogenetic autocorrelation in the  
 56 elevational distribution of plant (a) and animal species (b) at different taxonomic levels. The  
 57 more strongly related species are the more similar is their mean elevational distribution. When  
 58 we used the maximum and minimum of the range of species instead of the mean of the  
 59 elevational distribution of species the figures looked very similar. In animals, calculation of  
 60 Moran's I at the genus level was restricted to taxa which could be identified to genus level.

61

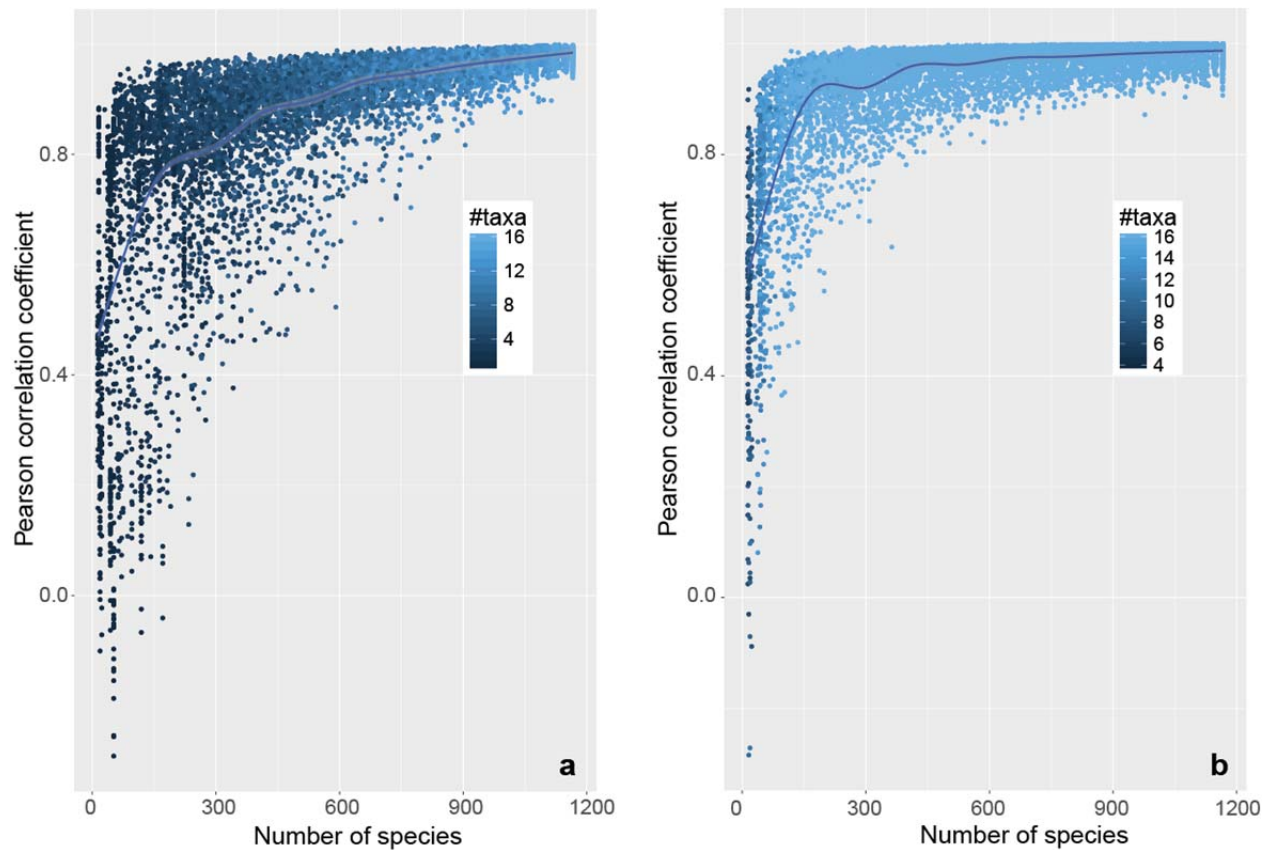

63

64 **Supplementary Figure 7| Inferring community diversity by stratified random sampling.**

65 Shown are correlation coefficients for the correlation between the true community level richness  
 66 and species richness estimates based on a stratified random sampling (a) or fully random  
 67 sampling of species (b). For these analyses we assumed that the cumulative species richness of  
 68 the 16 taxa sampled at 30 study sites along the Mt. Kilimanjaro elevational gradient represent the  
 69 true richness of complete animal communities. In the stratified random sampling, one to 16  
 70 higher level taxonomic units (e.g. ants, bees, Collembola) were randomly selected first and their  
 71 species numbers per study site were then assessed with a probability of 0.2, 0.4, 0.6, 0.8 or 1,  
 72 simulating variation in sampling intensity among taxa (binomial probability function with the  
 73 sampling probability randomly selected once for each taxonomic unit). The cumulative species



74 richness of all taxa was then correlated to the true community species richness. In the full  
75 random sampling approach, species were randomly selected from the whole species pool  
76 (without first selecting higher level taxonomic units). Species numbers of local assemblages (per  
77 study site) were then assessed with a probability of 0.2, 0.4, 0.6, 0.8 or 1 (binomial probability  
78 function). A random sample but also, slightly less efficiently, a stratified random sample of  
79 animal species gave a good representation of the community level diversity even when only a  
80 partition of their species or taxonomic units have been sampled. The sampling approach for  
81 animals at Mt. Kilimanjaro can be considered a stratified random sample of the community level  
82 richness, as the higher level taxonomic units and their respective sampling coverage were  
83 selected without any taxonomic bias, or hypothesis on elevational diversity in mind. Dots  
84 represent Pearson correlation coefficients for individual data sets. The lines show predictions of  
85 mean correlation coefficients derived from generalized additive models.

86

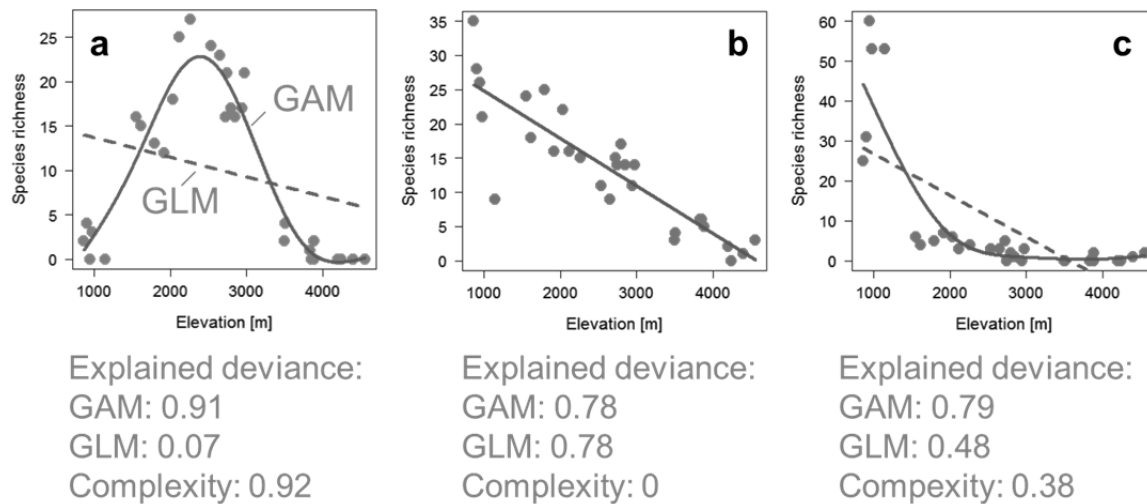

87

88 **Supplementary Figure 8 | Calculating complexity of elevational richness patterns.** The three

89 panels exemplify the calculation of the complexity of elevational species richness patterns (see

90 Fig. 2). In ferns (a), which show a clear mid-elevation peak, the explained deviance of a

91 generalized additive model (gam) is much higher than the explained deviance of a generalized

92 linear model (glm), so that the complexity value is very high. In case of simple linear

93 relationships, like in birds (b), gam and glm models show equal levels of explained deviance and

94 the corresponding complexity value is therefore 0. Orthoptera (c), show intermediate levels of

95 complexity in the elevational species richness pattern as the explained deviance of the gam

96 model is only moderately higher than the explained deviance of a glm model. Complexity values

97 for other taxonomic groups shown in Fig. 1 are: ferns = 0.92, magnoliids = 0.87, monocots =

98 0.61, other eudicots = 0.78, asterids = 0, rosids = 0.16, gastropods = 0.87, Collembola = 0.62,

99 Orthoptera = 0.41, bees = 0.40, parasitoid wasps = 0.41, non-apid aculeate hymenoptera = 0.42,

100 bees = 0.33, ground-dwelling beetles = 0.90, moths = 0.32, hoverflies = 0.75, amphibians = 0.11,

101 birds = 0, aerial insectivorous bats = 0.

102

103

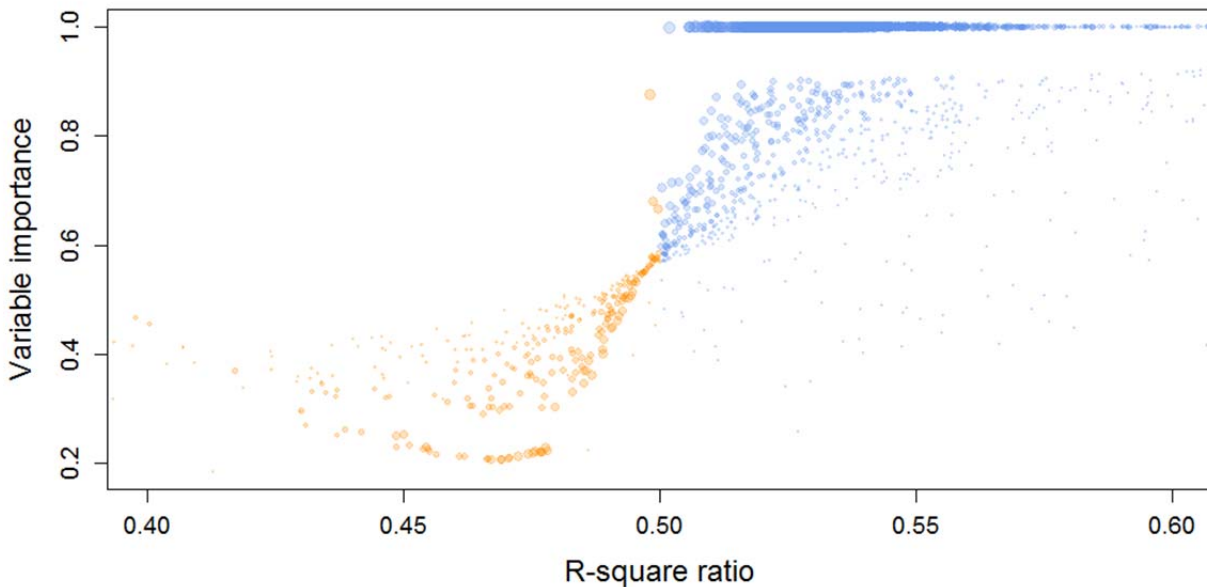

104

105 **Supplementary Figure 9| Properties of multi-model inference under high levels of**

106 **correlation among explanatory variables.** To demonstrate the sensitivity of variable  
107 importance values towards increasing levels of correlation among explanatory variables we  
108 created 2000 artificial variables of species richness, in which species richness was explicitly  
109 determined by mean annual temperature (MAT) [species richness  $\sim 0.3 * \text{MAT}$  (original field  
110 data)] with an error distributed normally with a zero mean and a standard deviation of 0.1 to 0.5.  
111 The resulting response variables varied in their degree of correlation to MAT ( $R^2$ : 0 – 0.96) and  
112 due to co-correlation with MAT ( $r = 0.93$ ) also with area ( $R^2$ : 0 – 0.93, for area also original  
113 variables were used). We modelled these artificial species richness variables as a function of  
114 MAT and area, using the original explanatory variables, in a simple additive linear model and  
115 used multi-model inference based on information theory to calculate levels of variable  
116 importance in the same way as done for the original data. We calculated simple linear  
117 regressions of the response variables on either MAT or area and calculated  $R^2$  values from these

118 regression models. We expect the methodology to be adequate if variable importance values  
119 decline when levels of variance explained by MAT and area become similar. The dot plot shows  
120 the variable importance of MAT in relationship to the relative  $R^2$  values of MAT and area [ $R^2$ -  
121 ratio =  $R^2_T / (R^2_T + R^2_{area})$ ]. The color of dots indicates whether the variable importance of MAT  
122 was higher than the variable importance of area (higher = blue, lower = orange). When the  
123 explanatory power of MAT is considerably higher than the explanatory power of area ( $R^2$ -ratio >  
124 0.5) the variable importance of MAT is high (e.g. > 0.8). In case of area having the same  
125 explanatory power as MAT (i.e.  $R^2$ -ratio = 0.5), variable importance values of MAT decline to  
126 levels of 0.5 indicating high levels of uncertainty to identify the 'correct' predictor of species  
127 richness. Variable importance of MAT declines to levels below 0.5 when  $R^2_T$  becomes smaller  
128 than  $R^2_{area}$ .

129

130 **Supplementary Tables**

131 **Supplementary Table 1| Sample coverage of taxa.** Shown are estimates of sample coverage of  
 132 all animal species calculated with the r-package iNEXT<sup>1</sup>. Sample coverage is a measure of  
 133 sample completeness, giving the proportion of the total number of individuals in a community  
 134 that belong to the species represented in the sample<sup>1</sup>. Subtracting the sample coverage from unity  
 135 gives the probability that the next individual collected belongs to a species not previously  
 136 collected in the sample. ‘NA’s indicate study sites where not a single specimen of a taxon was  
 137 found.

| Study site | Taxonomic group         |                   |                       |      |                         |       |           |            |              |            |            |       |                  |         |               |
|------------|-------------------------|-------------------|-----------------------|------|-------------------------|-------|-----------|------------|--------------|------------|------------|-------|------------------|---------|---------------|
|            | Other aculeate Hymenop. | Ground-dwel. ants | Aerial insectiv. bats | Bees | Ground-dwelling beetles | Birds | True bugs | Collembola | Dung beetles | Gastropods | Millipedes | Moths | Parasitoid wasps | Spiders | Syrphid flies |
| fer0       | 1.00                    | NA                | NA                    | 1.00 | 0.67                    | 1.00  | 1.00      | 1.00       | NA           | 1.00       | NA         | 1.00  | 0.77             | 0.63    | 1.00          |
| fer1       | 1.00                    | NA                | 1.00                  | 1.00 | 0.62                    | 1.00  | 0.58      | 1.00       | NA           | 1.00       | NA         | 0.49  | 0.91             | 0.76    | 1.00          |
| fer2       | 1.00                    | NA                | 1.00                  | 1.00 | NA                      | 1.00  | NA        | NA         | NA           | 1.00       | NA         | NA    | 0.86             | NA      | 1.00          |
| fer3       | NA                      | NA                | NA                    | 1.00 | 0.79                    | 0.96  | 1.00      | 1.00       | NA           | 1.00       | NA         | NA    | 0.74             | 0.65    | 1.00          |
| fer4       | NA                      | NA                | 0.93                  | 1.00 | 0.56                    | 0.85  | 1.00      | 1.00       | NA           | 1.00       | NA         | 0.67  | 0.83             | 0.44    | NA            |
| flm1       | 0.33                    | 0.93              | 0.92                  | 0.89 | 1.00                    | 0.98  | 0.58      | 0.98       | 0.97         | 1.00       | 0.67       | 0.43  | 0.64             | 0.73    | 0.93          |
| flm2       | NA                      | 0.67              | 0.86                  | 0.76 | 0.84                    | 0.95  | 0.67      | 0.98       | 1.00         | 1.00       | NA         | 0.03  | 0.36             | 0.86    | 0.90          |
| flm3       | 0.33                    | 1.00              | 0.95                  | 1.00 | 0.88                    | 0.95  | 0.63      | 0.99       | 0.63         | 1.00       | 0.84       | 0.60  | 0.48             | 0.70    | 0.91          |
| flm4       | NA                      | 0.83              | 0.97                  | 0.58 | 0.80                    | 0.97  | 1.00      | 0.97       | 1.00         | 0.98       | 1.00       | 0.51  | 0.45             | 1.00    | 0.88          |
| flm6       | 1.00                    | 0.63              | 0.84                  | 0.63 | 0.86                    | 0.98  | 0.76      | 0.88       | 1.00         | 1.00       | 1.00       | 0.13  | 0.66             | 0.73    | 0.67          |
| foc1       | NA                      | NA                | 0.83                  | NA   | 0.97                    | 0.98  | NA        | 0.99       | NA           | 0.98       | 1.00       | 0.83  | 0.40             | 0.97    | 0.88          |
| foc2       | NA                      | NA                | 0.67                  | 0.49 | 0.95                    | 0.98  | 0.67      | 0.99       | 0.67         | 0.98       | NA         | 1.00  | 0.41             | 0.66    | 0.76          |
| foc3       | NA                      | NA                | 0.89                  | 0.92 | 0.93                    | 0.97  | 1.00      | 1.00       | NA           | 0.98       | NA         | 0.67  | 0.07             | 1.00    | 1.00          |
| foc4       | NA                      | NA                | 0.92                  | 1.00 | 0.84                    | 1.00  | NA        | 0.98       | NA           | 0.98       | NA         | 0.67  | 0.05             | 1.00    | 0.67          |
| foc5       | NA                      | NA                | 0.94                  | 1.00 | 0.78                    | 0.98  | 1.00      | 0.98       | NA           | 0.98       | NA         | 0.67  | 0.66             | 0.78    | 1.00          |
| fpo1       | NA                      | NA                | 0.18                  | NA   | 0.94                    | 0.98  | NA        | 1.00       | NA           | 0.96       | NA         | 0.67  | 0.63             | 0.79    | 0.76          |
| fpo2       | NA                      | NA                | 0.93                  | NA   | 0.94                    | 1.00  | NA        | 0.99       | NA           | 0.97       | NA         | 0.82  | 0.39             | 0.68    | 1.00          |
| fpo3       | NA                      | NA                | 1.00                  | NA   | 0.85                    | 0.96  | 1.00      | 0.98       | NA           | 1.00       | NA         | 0.63  | 0.49             | 0.70    | 1.00          |
| fpo4       | 1.00                    | NA                | 0.87                  | 0.96 | 0.96                    | 1.00  | 0.76      | 0.98       | NA           | 1.00       | NA         | 0.65  | 0.29             | 0.83    | 1.00          |
| fpo5       | 1.00                    | NA                | 1.00                  | 0.92 | 0.86                    | 0.98  | 1.00      | 1.00       | NA           | 0.99       | 0.63       | 0.56  | 0.68             | 0.95    | 0.78          |
| hel1       | 1.00                    | NA                | 1.00                  | 1.00 | 0.58                    | 1.00  | 1.00      | 1.00       | NA           | 1.00       | NA         | 0.67  | 0.83             | 0.90    | 1.00          |
| hel2       | NA                      | NA                | NA                    | 1.00 | 0.49                    | 1.00  | 1.00      | 0.93       | NA           | 1.00       | NA         | NA    | 1.00             | 0.81    | NA            |
| hel3       | 0.83                    | NA                | NA                    | 1.00 | 1.00                    | NA    | NA        | 1.00       | NA           | 1.00       | NA         | NA    | 1.00             | 0.77    | 1.00          |
| hel4       | 1.00                    | NA                | NA                    | 1.00 | 0.63                    | 1.00  | NA        | 1.00       | NA           | NA         | NA         | NA    | 1.00             | 0.63    | NA            |
| hel5       | NA                      | NA                | NA                    | 1.00 | 0.90                    | 1.00  | NA        | 1.00       | NA           | NA         | NA         | NA    | 0.67             | 0.78    | NA            |
| sav1       | 0.40                    | 0.81              | 0.85                  | 0.92 | 0.58                    | 0.95  | 0.66      | 0.96       | 0.95         | 1.00       | 1.00       | 0.90  | 0.02             | 0.33    | 1.00          |
| sav2       | 0.28                    | 0.86              | 0.97                  | 0.93 | 0.62                    | 0.95  | 0.73      | 0.83       | 0.93         | 1.00       | 1.00       | 0.78  | 0.40             | 0.11    | 1.00          |
| sav3       | 0.05                    | 0.88              | 0.73                  | 0.84 | 1.00                    | 0.98  | 0.39      | 1.00       | 0.87         | 1.00       | 1.00       | 0.68  | 0.32             | 0.67    | 1.00          |
| sav4       | 0.18                    | 0.60              | 0.94                  | 0.95 | NA                      | 0.93  | 0.79      | 0.98       | 0.98         | 0.99       | NA         | 0.11  | 0.07             | 0.33    | 1.00          |
| sav5       | 0.04                    | 0.79              | 0.98                  | 0.91 | 0.51                    | 0.99  | 0.74      | 0.99       | 0.96         | 1.00       | NA         | 0.47  | 0.21             | 0.76    | 1.00          |

139

140 **Supplementary Table 2| Test of the influence of sampling biases on elevational patterns of**  
 141 **species richness.** Observed and Chao1-estimated species richness values were modelled as a  
 142 function of elevation using generalized additive models with a basis dimension of five. Based on  
 143 these models, predictions of species richness for each site were calculated. Pearson's r give the  
 144 coefficients of correlation of species richness predictions based on observed and the chao1-  
 145 estimated species richness. Values near one indicate highly similar patterns of elevational species  
 146 richness. Data in the column ESR pattern indicates the type of elevational richness pattern based  
 147 on Chao1-estimated species richness. Under 'Notes' we described all changes in elevational  
 148 species richness patterns based on Chao1-based species richness estimates in comparison to  
 149 those presented in Fig. 1 of the main manuscript.

| Taxon                      | Pearson's r | ESR pattern          | Notes                                                                                                                                       |
|----------------------------|-------------|----------------------|---------------------------------------------------------------------------------------------------------------------------------------------|
| Gastropods                 | 0.99        | Unimodal             | Same pattern                                                                                                                                |
| Millipedes                 | 0.99        | Unimodal             | Same pattern                                                                                                                                |
| Spiders                    | 0.66        | Bimodal              | Similar pattern but higher richness in savannah and lower in upper montane forests                                                          |
| Collembola                 | 1.00        | Unimodal             | Same pattern                                                                                                                                |
| True bugs                  | 1.00        | Exponential decline  | Same pattern                                                                                                                                |
| Parasitoid wasps           | 0.98        | Unimodal             | Similar pattern; estimated richness in savannah slightly higher, at elevations above 3000 m asl slightly lower                              |
| Ground-dwelling ants       | 1.00        | Exponential decline  | Same pattern                                                                                                                                |
| Bees                       | 0.98        | Exponential decline  | Similar pattern; slight increase in forests of 1500-2300 m asl and slight decrease in savannah                                              |
| Other aculeate Hymenoptera | 1.00        | Exponential decline  | Same pattern                                                                                                                                |
| Ground-dwelling beetles    | 0.91        | Unimodal             | Similar pattern; Slightly higher species richness in lowlands, lowered richness in mid-elevations and slight increase in highest elevations |
| Dung beetles               | 1.00        | Exponential decline  | Same pattern                                                                                                                                |
| Moths                      | 0.95        | Quasi-linear decline | Similar but less exponential pattern, more linear                                                                                           |
| Hoverflies                 | 0.98        | Unimodal             | Similar pattern but slight increase in forests of 1500-2000 m and slight decrease in 2500-3000 m asl                                        |
| Birds                      | 1.00        | Linear decline       | Same pattern                                                                                                                                |
| Aerial insectivorous bats  | 1.00        | Linear decline       | Same pattern                                                                                                                                |

150 **Supplementary Table 3**| Synthesis models explaining richness patterns of species-poor plant  
 151 taxa. Shown are results of multi-model averaging models for Lycopodiopsida and conifers. .

| Taxon          | #species* | #models† | Conditional standardized estimates <sup>β</sup> |       |       |       |      |
|----------------|-----------|----------|-------------------------------------------------|-------|-------|-------|------|
|                |           |          | MMT                                             | NPP   | MAP   | Area  | MDE  |
| Lycopodiopsida | 4         | 7        | 0.55                                            | -0.10 | 0.54  | -0.55 | 0.03 |
| Conifers       | 1         | 8        | 1.19                                            | -0.30 | -0.26 | -1.35 | 0.47 |

152 Shown are standardized parameter estimates of predictor variables derived from weighted averaging of parameter  
 153 estimates over best-fit models. Colors indicate significant ( $P < 0.05$ ) positive (blue) or negative (red) effects in  
 154 multi-model averaging analyses.

155 \*total number of detected species/morphospecies for each taxon

156 †number of best-fit models ( $\Delta AIC < 4$ ) used for inference on parameter estimates and variable importance.

157 <sup>β</sup>Standardized parameter estimates (standardized beta) over all best-fit models including the respective predictor  
 158 variable.

159 Predictor variables: MMT = Mean minimum temperature, NPP = net primary productivity, MAP = mean annual  
 160 precipitation, MDE = mid-domain effect prediction.

161 **Supplementary Methods**

162 **Sampling protocols for studied taxa:** Vascular plants [Tracheophyta; data owner: A.H.]: Plant  
163 species richness was assessed on one 20 x 50 m subplot per study site using the method of  
164 Braun-Blanquet<sup>2</sup>. Plant formations without seasonal variation in the presence of species (e.g.  
165 forests, alpine vegetation) were surveyed only once. Vegetation types with high seasonal  
166 variation and high proportions of annuals (savannah) were surveyed several times.

167 Ground-dwelling ants [Formicidae; data owner: M.K.P.]: Ant species richness was assessed  
168 using a diverse set of resource baits. Thirty 50 ml plastic tubes, holding one of six different  
169 nutrients in solution (H<sub>2</sub>O, NaCl, glutamine, CHO (sucrose), CHO + glutamine, olive oil), were  
170 placed on the ground at times of peak ant activity and recollected with foraging ants after 2 h. All  
171 specimens were first identified to genus and then sorted into different morphospecies. For  
172 details, see Peters et al.<sup>3</sup>.

173 Hymenoptera and hoverflies [with the exception of ants; data owners: A.C., W.J.K., R.S.P.,  
174 C.D.E., M.K.P., I.S.D.]: Data on species richness of bees, other aculeate Hymenoptera (with  
175 exception of ants), parasitoid wasps and hoverflies were collected using pan traps<sup>4,5</sup>. A total of  
176 eight pan trap clusters, each consisting of one UV-bright blue, one yellow and one white pan  
177 were installed along two 50 m transects on each plot with a minimal distance of 15 m between  
178 clusters. We sampled pollinators in different vegetation heights, i.e. ~35 cm (herbal layer) and  
179 ~120 cm (shrub layer) above the ground. At study sites in forests we installed a subset of traps in  
180 the lower canopy (up to ~25 m). Pan traps were filled with water and a drop of liquid soap to  
181 break the water's surface tension, and were recollected after 48 hours. Three sampling rounds  
182 were conducted summing up to a total of 24 pant trap clusters per plot. Due to the large number  
183 of specimens, for parasitoid wasps and other aculeate Hymenoptera only the specimens of two



184 sampling rounds were analyzed. Species were sorted to morphospecies level and, wherever  
185 possible, identified to species level. The group of parasitoid wasps included all apocritan  
186 Hymenoptera except Aculeata, and except Ichneumonidae, Eulophidae and Mymaridae.  
187 Specimens of the latter three groups were excluded as these were difficult to preserve and hardly  
188 identifiable on to morphospecies without specialized taxonomic expertise.

189 Moths [Heterocera; data owners: C.B., M.H.-B., M.T.]: Moths were caught using a custom-built  
190 automatic light trap with a superactinic light tube (6 watt, FRITZ WEBER Entomologiebedarf,  
191 Stuttgart, Germany). Wherever possible the trap was set up in the center of the study sites. On  
192 each study site the light trap was operated over four periods of 20 min (80 min in total), between  
193 7 pm and 10 pm, starting 30 min after sunset. In all habitat types with at least occasional trees or  
194 shrubs, the trap was installed on an obstacle-free branch at a height of 1.5-2 m above the ground.  
195 In the treeless alpine zone the light trap was placed 0.3 m above ground. All sampled moths were  
196 dried and classified to morphospecies.

197 Dung beetles [subfamilies Scarabaeinae and Aphodiinae and genus *Trox* of the family Trogidae;  
198 data owners: F.G., I.S.D., M.K.P]: Dung beetles were collected with baited pitfall traps. On each  
199 study site one pitfall trap (upper diameter 33cm, lower diameter 24cm, height 15cm) was placed  
200 and equipped with 1.5 L of water and a drop of liquid soap to break water surface tension. Above  
201 traps 700 g of fresh cow dung was placed on a mesh. Cow dung was frozen for at least 24 hours  
202 prior to the experiment to make sure any dung beetles already in the dung were killed. Traps  
203 were left open for 72 h and after this time all captured specimens were sieved and stored in  
204 whirlpacks filled with 70% ethanol. In the laboratory dung beetles were sorted to families, then  
205 to morphospecies or species level.

206 Orthoptera [grasshoppers, locusts and bushcrickets; data owner: C.H.]: Orthoptera assemblages  
207 were recorded on all study sites by repeatedly walking for 1.5 h on parallel tracks (distance  
208 between transects ca. 1-1.5 m) and recording all sighted species. In forested study sites, trees and  
209 bushes in the understory vegetation were shaken for approximately 1.5 h. Insects falling from the  
210 vegetation were gathered on white canvas laid on the forest floor. Species which could not be  
211 identified during visits were collected and later identified. Study sites were also visited at night  
212 where Ensifera were registered acoustically. Additionally, two rounds of sweep net sampling  
213 were conducted on study sites to collect small species which may have remained undetected  
214 during transect walks. One round was conducted during the cool dry season (July to October)  
215 and one during the warm dry season (December to March). During each sweep netting round,  
216 100 sweeps with a 30-cm diameter sweep were taken and all collected specimens were identified  
217 in the laboratory. Species accumulation curves for Caelifera and Ensifera on Mt. Kilimanjaro  
218 were published in Hemp<sup>6,7</sup> showing that more than 90% of the grasshopper, locust and  
219 bushcricket fauna for Mt. Kilimanjaro have been registered.

220 Ground-dwelling beetles [Coleoptera; data owners: J.R., R.B.]: Assemblages of ground-dwelling  
221 beetles were sampled with pitfall traps<sup>8</sup>. Ten pitfall traps were evenly spaced along two 50 m  
222 transects, with a distance of 10 m between individual traps and 20 m between transects. Pitfall  
223 traps were filled with 100-200 ml solution of equal parts of ethylenglycol and water with a drop  
224 of liquid soap to break the surface tension. The traps were placed on the sampling sites in June  
225 2012 and collected after seven days. As the number of individuals collected in ten traps was very  
226 high and all individuals could not be analyzed in time, for the present analysis, we processed  
227 only three traps from each study site. Ground-dwelling beetles were sorted to morphospecies  
228 level, and where possible, to species.

229 True bugs [Heteroptera, data owner: M.K.P., J.T., J.D.]: True bugs were collected in two rounds  
230 of sweep net samplings. One round was conducted during the cool dry season (July to October)  
231 and one during the warm dry season (December to March). During each sweep netting round,  
232 100 sweeps with a 30-cm diameter sweep were taken along two 50 m transects. All collected  
233 specimens were identified in the laboratory to families, then to species or morphospecies. Only  
234 data of adult specimens were used.

235 Collembola [springtails; data owners: J.R., R.B.]: For springtails we used the same sampling  
236 procedures as for the beetles (see above).

237 Ground-dwelling spiders [Araneae: data owner: M.H., J.R., R.B.]: Ground-dwelling spiders were  
238 collected from the same samples as the ground-dwelling beetles and Collembola. All adult and  
239 subadult spiders (74% of all spider individuals) were sorted to families and morphospecies.

240 Terrestrial gastropods [snails and slugs; data owners: C.N., R.B.]: To assess the species richness  
241 of terrestrial gastropods, a combination of two methods were applied at each sampling site<sup>9-11</sup>.  
242 First, we conducted four rounds of fixed-time surveys of 30 min in different seasons in which we  
243 intensively searched study sites for both living gastropods and empty shells. During these  
244 surveys we intensively searched all potential microhabitats of gastropods including the ground,  
245 the leaf litter, fallen tree trunks, under and on rocks and under bark. Second, we collected a total  
246 of 1L of leaf litter from different spots on each study site in order to collect gastropods of small  
247 size which may have remained undetected during fixed-time surveys. The litter was air-dried and  
248 sieved using a combination of stacked sieves of different mesh sizes (mesh size of top sieve = 2  
249 mm and bottom 0.5 mm) and carefully inspected for shells using a stereomicroscope. Gastropods  
250 identification was based on external morphology. The use of the two methods allowed the

251 detection of both large-sized taxa that often occur at low density and micro-species that are  
252 cryptic and litter-dwelling.

253 Millipedes [Diplopoda; data owner: S.B.F., J.R., R.B.]: Millipedes were collected by a  
254 combination of pitfall trapping and repeated fixed-time (2 hours) intensive searches by hand.  
255 Pitfall trapping was done with five rounds of pitfall traps, most traps being placed in the small  
256 wet season around November or the months after the big wet season (June-September). Hand  
257 collecting was carried out in November-December and again in February - April, with dryer  
258 areas, such as savannah, being sampled when it was moist and green. Study sites were searched  
259 thoroughly by hand for two hours by searching places millipedes could conceivably be found,  
260 such as under rocks, dead wood or leaf litter. The collected millipedes were stored in 70%  
261 ethanol and identified in the laboratory. As male gonopods are crucial for determining the  
262 species, only data on adult male individuals was used.

263 Amphibians [Amphibia; data owners: G.Z., I.S.D., M.-O.R.]: Data on anurans were not collected  
264 on the same study sites like the other taxa but at 18 nearby study sites with lentic or lotic water  
265 sources which covered an elevational gradient from 905 m to 3548 m asl along the southern  
266 slopes of the mountain. Further surveys covered areas up to 4000 m asl. Above 3500 m, we did  
267 not find any amphibians. During diurnal and nocturnal random walks, we used a combination of  
268 visual and acoustic encounter surveys to search for frogs in all microhabitats<sup>12</sup>. All visits were  
269 randomly distributed during the sampling periods, and all sites were visited at least three times.  
270 For details, see Zancolli et al.<sup>13</sup>.

271 Birds [Aves; data owners: S.W.F., K.B.-G.]: We used audiovisual point counts on eight subplots  
272 per study site to record birds<sup>14</sup>. We established circles with a 20-m radius in densely vegetated  
273 habitats (savannah and all forest habitats) and 35.5 m × 35.5 m squares at alpine *Helichrysum*

274 sites, covering the same sampling area in all habitat types. Point counts started 15 min before  
275 sunrise and were completed before 9 am. All birds heard or seen in one subplot were counted for  
276 10 min and identified<sup>15</sup>. Birds were counted in all strata, including the ground, the lower  
277 vegetation, the tree canopy and above the tree canopy. Birds were surveyed twice per study site,  
278 once during the cool dry season (July to October) and once during the warm dry season  
279 (December to March). All 480 point counts (30 study sites × 8 subplots × 2 seasons) were  
280 conducted by the same observer to reduce inter-observer variability.

281 Aerial insectivorous bats [Chiroptera; data owners: M.H.-B., M.T.]: Species richness of aerial  
282 insectivorous bats was assessed by acoustic monitoring using a standardized point stop method at  
283 the four corners of the study sites<sup>16</sup>. Every corner was visited for five minutes and echolocation  
284 calls of all passing bats were recorded manually using a real time ultrasound recorder (Pettersson  
285 D1000x). All four corners of one site were visited four times between local sunset and 11:30 pm,  
286 resulting in 80 min recording per study site per night. Echolocation calls were classified into  
287 sonotypes based on call characteristics (start and end frequency, the frequency with the highest  
288 amplitude, call duration and intervals between calls). The number of distinct sonotypes recorded  
289 per study site was used as a measure of bat species richness.

290

## 291 **Supplementary References**

- 292 1. Chao, A. & Jost, L. Coverage-based rarefaction and extrapolation: standardizing samples by  
293 completeness rather than size. *Ecology*, **93**, 2533-2547 (2012).
- 294 2. Braun-Blanquet, J. *Pflanzensoziologie: Grundzüge der Vegetationskunde*. (Springer-Verlag,  
295 1964).

- 296 3. Peters, M. K., Mayr, A., Röder, J., Sanders, N. J. & Steffan-Dewenter, I. Variation in  
297 nutrient use in ant assemblages along an extensive elevational gradient on Mt Kilimanjaro. *J.*  
298 *Biogeogr.* **41**, 2245–2255 (2014).
- 299 4. Classen, A. *et al.* Temperature versus resource constraints: which factors determine bee  
300 diversity on Mount Kilimanjaro, Tanzania?: Bee species richness on Mt Kilimanjaro. *Glob.*  
301 *Ecol. Biogeogr.* **24**, 642–652 (2015).
- 302 5. Westphal, C. *et al.* Measuring bee diversity in different European habitats and  
303 biogeographical regions. *Ecol. Monogr.* **78**, 653–671 (2008).
- 304 6. Hemp, C. Annotated list of Caelifera (Orthoptera) of Mt. Kilimanjaro, Tanzania. *J.*  
305 *Orthoptera Res.* **18**, 183–214 (2009).
- 306 7. Hemp, C. Annotated list of Ensifera (Orthoptera) and further records on Caelifera  
307 (Orthoptera) of Mt Kilimanjaro, Tanzania. *Zootaxa* **3613**, (2013).
- 308 8. Röder, J., Detsch, F., Otte, I., Appelhans, T., Nauss, T., Peters, M.K. & Brandl, R. (*in press*)  
309 Heterogeneous patterns of abundance of epigeic arthropod taxa along a major elevation  
310 gradient. *Biotropica*. DOI: 10.1111/btp.12403
- 311 9. Emberton, K. C., Pearce, T. A. & Randalana, R. Quantitatively sampling land-snail species  
312 richness in Madagascan rainforests. *Malacologia* **38**, 203–212 (1996).
- 313 10. Emberton, K. C., Pearce, T. A., Kasigwa, P. F., Tattersfield, P. & Habibu, Z. High diversity  
314 and regional endemism in land snails of eastern Tanzania. *Biodivers. Conserv.* **6**, 1123–1136  
315 (1997).
- 316 11. Tattersfield, P. Local patterns of land snail diversity in a Kenyan rainforest. *Malacologia* **38**,  
317 161–180 (1996).

- 318 12. Rödel, M.-O. & Ernst, R. Measuring and monitoring amphibian diversity in tropical forests.  
319 I. An evaluation of methods with recommendations for standardization. *Ecotropica* **10**, 1–14  
320 (2004).
- 321 13. Zancolli, G., Steffan-Dewenter, I. & Rödel, M.-O. Amphibian diversity on the roof of  
322 Africa: unveiling the effects of habitat degradation, altitude and biogeography. *Divers.*  
323 *Distrib.* **20**, 297–308 (2014).
- 324 14. Ferger, S. W., Schleuning, M., Hemp, A., Howell, K. M. & Böhning-Gaese, K. Food  
325 resources and vegetation structure mediate climatic effects on species richness of birds:  
326 Climate and bird species richness. *Glob. Ecol. Biogeogr.* **23**, 541–549 (2014).
- 327 15. Zimmerman, D. A., Turner, D. A. & Pearson, D. J. *Birds of Kenya and Northern Tanzania.*  
328 (Princeton University Press, 1999).
- 329 16. Helbig-Bonitz, M., Ferger, S. W., Böhning-Gaese, K., Tschapka, M., Howell, K., & Kalko,  
330 E. K. (2015). Bats are not birds - different responses to human land-use on a tropical  
331 mountain. *Biotropica*, **47**, 497-508.  
332  
333
